# Supplementary material for: Characteristics of the Microbial Community in the Production of Chinese Rice-Flavor Baijiu and Comparisons With the Microflora of Other Flavors of Baijiu
Source: Front Microbiol. 2021 Apr 29;12:673670. doi: 10.3389/fmicb.2021.673670 (PMC8116502; doi:10.3389/fmicb.2021.673670)
Supplement: Supplementary file 3 [file Table_3.XLSX]

## Sheet: ITS
No.	BioSample	AvgSpotLen	Sample ID	Samples ID in this study	Sample type	NCBI Bioproject ID
1	SRR11490804	S0-1-ITS	Sa0	Sfb	Fermented grains of strong-flavor baijiu	PRJNA622890
2	SRR11490803	S0-2-ITS	Sb0	Sfb	Fermented grains of strong-flavor baijiu	PRJNA622890
3	SRR11490802	S0-3-ITS	Sc0	Sfb	Fermented grains of strong-flavor baijiu	PRJNA622890
4	SRR11490801	S7-1-ITS	Sa7	Sfb	Fermented grains of strong-flavor baijiu	PRJNA622890
5	SRR11490800	S7-2-ITS	Sb7	Sfb	Fermented grains of strong-flavor baijiu	PRJNA622890
6	SRR11490799	S7-3-ITS	Sc7	Sfb	Fermented grains of strong-flavor baijiu	PRJNA622890
7	SRR11490798	S15-1-ITS	Sa15	Sfb	Fermented grains of strong-flavor baijiu	PRJNA622890
8	SRR11490797	S15-2-ITS	Sb15	Sfb	Fermented grains of strong-flavor baijiu	PRJNA622890
9	SRR11490795	S15-3-ITS	Sc15	Sfb	Fermented grains of strong-flavor baijiu	PRJNA622890
10	SRR11490794	S25-1-ITS	Sa25	Sfb	Fermented grains of strong-flavor baijiu	PRJNA622890
11	SRR11490793	S25-2-ITS	Sb25	Sfb	Fermented grains of strong-flavor baijiu	PRJNA622890
12	SRR11490792	S25-3-ITS	Sc25	Sfb	Fermented grains of strong-flavor baijiu	PRJNA622890
13	SRR11490791	S45-1-ITS	Sa45	Sfb	Fermented grains of strong-flavor baijiu	PRJNA622890
14	SRR11490790	S45-2-ITS	Sb45	Sfb	Fermented grains of strong-flavor baijiu	PRJNA622890
15	SRR11490789	S45-3-ITS	Sc45	Sfb	Fermented grains of strong-flavor baijiu	PRJNA622890
16	SRR11490788	S70-1-ITS	Sa70	Sfb	Fermented grains of strong-flavor baijiu	PRJNA622890
17	SRR11490787	S70-2-ITS	Sb70	Sfb	Fermented grains of strong-flavor baijiu	PRJNA622890
18	SRR11490786	S70-3-ITS	Sc70	Sfb	Fermented grains of strong-flavor baijiu	PRJNA622890
19	SRR11490784	S95-1-ITS	Sa95	Sfb	Fermented grains of strong-flavor baijiu	PRJNA622890
20	SRR11490783	S95-2-ITS	Sb95	Sfb	Fermented grains of strong-flavor baijiu	PRJNA622890
21	SRR11490782	S95-3-ITS	Sc95	Sfb	Fermented grains of strong-flavor baijiu	PRJNA622890
40	SRR13659303	L(ITS)d0A	Ld0A	Lfb	Fermented grains of light-flavor baijiu	PRJNA699760
41	SRR13659302	L(ITS)d0B	Ld0B	Lfb	Fermented grains of light-flavor baijiu	PRJNA699760
42	SRR13659301	L(ITS)d1A	Ld1A	Lfb	Fermented grains of light-flavor baijiu	PRJNA699760
43	SRR13659300	L(ITS)d1B	Ld1B	Lfb	Fermented grains of light-flavor baijiu	PRJNA699760
44	SRR13659298	L(ITS)d3A	Ld3A	Lfb	Fermented grains of light-flavor baijiu	PRJNA699760
45	SRR13659297	L(ITS)d3B	Ld3B	Lfb	Fermented grains of light-flavor baijiu	PRJNA699760
46	SRR13659296	L(ITS)d5A	Ld5A	Lfb	Fermented grains of light-flavor baijiu	PRJNA699760
47	SRR13659295	L(ITS)d5B	Ld5B	Lfb	Fermented grains of light-flavor baijiu	PRJNA699760
48	SRR13659294	L(ITS)d7A	Ld7A	Lfb	Fermented grains of light-flavor baijiu	PRJNA699760
49	SRR13659293	L(ITS)d7B	Ld7B	Lfb	Fermented grains of light-flavor baijiu	PRJNA699760
50	SRR13659292	L(ITS)d10A	Ld10A	Lfb	Fermented grains of light-flavor baijiu	PRJNA699760
51	SRR13659291	L(ITS)d10B	Ld10B	Lfb	Fermented grains of light-flavor baijiu	PRJNA699760
52	SRR13659290	L(ITS)d15A	Ld15A	Lfb	Fermented grains of light-flavor baijiu	PRJNA699760
53	SRR13659289	L(ITS)d15B	Ld15B	Lfb	Fermented grains of light-flavor baijiu	PRJNA699760
22	SRR13659105	0(ITS)day1	0day1	Rfb	Fermented rice of rice-flavor baijiu	PRJNA699433
23	SRR13659104	0(ITS)day2	0day2	Rfb	Fermented rice of rice-flavor baijiu	PRJNA699433
24	SRR13659102	0(ITS)day3	0day3	Rfb	Fermented rice of rice-flavor baijiu	PRJNA699433
25	SRR13659101	2(ITS)day1	2day1	Rfb	Fermented rice of rice-flavor baijiu	PRJNA699433
26	SRR13659100	2(ITS)day2	2day2	Rfb	Fermented rice of rice-flavor baijiu	PRJNA699433
27	SRR13659099	2(ITS)day3	2day3	Rfb	Fermented rice of rice-flavor baijiu	PRJNA699433
28	SRR13659098	5(ITS)day1	5day1	Rfb	Fermented rice of rice-flavor baijiu	PRJNA699433
29	SRR13659097	5(ITS)day2	5day2	Rfb	Fermented rice of rice-flavor baijiu	PRJNA699433
30	SRR13659096	5(ITS)day3	5day3	Rfb	Fermented rice of rice-flavor baijiu	PRJNA699433
31	SRR13659095	10(ITS)day1	10day1	Rfb	Fermented rice of rice-flavor baijiu	PRJNA699433
32	SRR13659094	10(ITS)day2	10day2	Rfb	Fermented rice of rice-flavor baijiu	PRJNA699433
33	SRR13659093	10(ITS)day3	10day3	Rfb	Fermented rice of rice-flavor baijiu	PRJNA699433
34	SRR13659091	13(ITS)day1	13day1	Rfb	Fermented rice of rice-flavor baijiu	PRJNA699433
35	SRR13659090	13(ITS)day2	13day2	Rfb	Fermented rice of rice-flavor baijiu	PRJNA699433
36	SRR13659089	13(ITS)day3	13day3	Rfb	Fermented rice of rice-flavor baijiu	PRJNA699433
37	SRR13659088	qu(ITS)1	qu1	Xq-Rfb	Xiaoqu used in rice-flavor baijiu	PRJNA699433
38	SRR13659087	qu(ITS)2	qu2	Xq-Rfb	Xiaoqu used in rice-flavor baijiu	PRJNA699433
39	SRR13659086	qu(ITS)3	qu3	Xq-Rfb	Xiaoqu used in rice-flavor baijiu	PRJNA699433
54	SRR13659287	L(ITS)XQA	QA	Xq-Lfb	Xiaoqu used in light-flavor baijiu	PRJNA699760
55	SRR13659286	L(ITS)XQB	QB	Xq-Lfb	Xiaoqu used in light-flavor baijiu	PRJNA699760
